# Supplementary material
Source: PubMed Central journal article supplement (PMC9031351)
Supplement: NIHMS1794669-supplement-1.pdf [file NIHMS1794669-supplement-1.pdf]

# Supplemental Appendix

## Table of Contents

---

|                                                                                                 |   |
|-------------------------------------------------------------------------------------------------|---|
| Supplemental Table 1. List of ICD Codes for Medical Comorbidities of Patient Cohort             | 2 |
| Supplemental Table 2: List of CPT, HCPCS, and ICD Codes for CAD Testing Procedures              | 3 |
| Supplemental Table 3. Predictors of CAD Testing–Sensitivity Analyses by Inclusion Criteria      | 4 |
| Supplemental Table 4. Predictors of CAD Testing–Sensitivity Analyses by Scenario                | 5 |
| Supplemental Figure 1. Breakdown of CAD Testing and Interventions by Modality                   | 6 |
| Supplemental Figure 2. National Variation in CAD Testing for Incident Heart Failure Patients    | 7 |
| Supplemental Figure 3. Variation in the Frequency of CAD Testing across Primary Care Physicians | 8 |

---

Supplemental Table 1. List of ICD Codes for Medical Comorbidities of Patient Cohort

| Variable                             | ICD-9 |       |       |       |       |       | ICD-10 |        |        |        |        |         |  |
|--------------------------------------|-------|-------|-------|-------|-------|-------|--------|--------|--------|--------|--------|---------|--|
| Atrial fibrillation                  | 4273- |       |       |       |       |       | I48-   |        |        |        |        |         |  |
| Alcohol use disorder                 | 291-  | 303-  | 305-  | 3575  | 4255  | 5353- | E244   | E8600  | F10-   | G312   | G621   | G721    |  |
|                                      | 5710  | 5711  | 5712  | 5713  | 76071 | 7903  | I426   | K292-  | K70-   | K852-  | K860   | O354XX- |  |
|                                      | 9808  | 9809  | V113  |       |       |       | O9931- | R780   | T510X- | Y90-   | Z7141  |         |  |
| Cancer                               | 14-   | 15-   | 16-   | 17-   | 18-   | 19-   | C0-    | C1-    | C2-    | C3-    | C4-    | C5-     |  |
|                                      | 200-  | 201-  | 202-  | 203-  | 204-  | 205-  | C6-    | C7-    | C8-    | C9-    | D0-    | D45     |  |
|                                      | 206-  | 207-  | 208-  | 2090- | 2091- | 2092- | D4622  | D469   | D46C   | D46Z   | D471   | D473    |  |
|                                      | 2093- | 2097- | 230-  | 231-  | 232-  | 233-  | D474   | D47Z1  | D6182  | D7581  |        |         |  |
|                                      | 234-  | 2384  | 2385  | 2386  | 2387- | 2592  |        |        |        |        |        |         |  |
| Cardiogenic shock                    | 78550 | 78551 |       |       |       |       | R570   | R579   |        |        |        |         |  |
| Chronic kidney disease               | 28521 | 403-  | 404-  | 45821 | 582-  | 5853  | E082-  | E092-  | E102-  | E112-  | E132-  | I12-    |  |
|                                      | 5854  | 5855  | 5859  | 586   |       |       | I13-   | I953   | N03-   | N11-   | N183-  | N184    |  |
|                                      |       |       |       |       |       |       | N185   | N189   | N19    | O102-  | O103-  |         |  |
| Chronic liver disease                | 07022 | 07023 | 07032 | 07033 | 07044 | 07054 | B18-   | K70-   | K710   | K711-  | K713   | K714    |  |
|                                      | 571-  | 5722  | 5723  | 5724  | 5728  | 5735  | K715-  | K716   | K717   | K718   | K719   | K72-    |  |
|                                      | 5738  | 5739  | 5714- | V427  |       |       | K73-   | K74-   | K753   | K754   | K758-  | K759    |  |
|                                      |       |       |       |       |       |       | K76-   | K77    | Z944   |        |        |         |  |
| COPD or asthma                       | 491-  | 492   | 4930- | 4931- | 4932- | 496   | J41-   | J42-   | J43-   | J44-   | J45-   |         |  |
|                                      | 4938- | 4939- |       |       |       |       |        |        |        |        |        |         |  |
| Coronary artery disease <sup>a</sup> | 412   | 4140- | 4142  | 4143  | 4148  | 4149  | I251-  | I252   | I255   | I256   | I2570- | I2571-  |  |
|                                      | 4292  | 7932  |       |       |       |       | I2572- | I2573- | I2575- | I2576- | I2579- | I258    |  |
|                                      |       |       |       |       |       |       | I259   | R931   |        |        |        |         |  |
| Dementia                             | 2900  | 2901- | 2902- | 2903  | 2904- | 2941- | F015-  | F028-  | F039-  | G30-   | G310-  | G311    |  |
|                                      | 2942- | 3310  | 3311- | 3312  | 33182 |       | G3183  |        |        |        |        |         |  |
| Depression                           | 2962- | 2963- | 29682 | 2969- | 3004  | 30112 | F32-   | F33-   | F34-   | F38-   | F39    | F412    |  |
|                                      | 30113 | 3090  | 3091  | 30928 | 311   |       | F4321  | F4323  | F530   |        |        |         |  |
| Diabetes                             | 250-  |       |       |       |       |       | E08-   | E09-   | E10-   | E11-   | E13-   | O24-    |  |
| Endocarditis                         | 03642 | 07422 | 0932- | 09884 | 11281 | 11504 | A1884  | A3282  | A3951  | A5203  | A5483  | B3321   |  |
|                                      | 11514 | 11594 | 3911  | 3979  | 421-  | 4249- | B376   | I011   | I091   | I33-   | I38    | I39     |  |
|                                      |       |       |       |       |       |       | M3211  |        |        |        |        |         |  |
| Heart failure                        | 39891 | 402-1 | 404-1 | 404-3 | 428-  |       | I0981  | I110   | I130   | I132   | I50-   |         |  |
| Hyperlipidemia                       | 272-  |       |       |       |       |       | E78-   |        |        |        |        |         |  |
| Hypertension                         | 401-  | 402-  | 403-  | 404-  | 405-  |       | I10    | I11-   | I12-   | I13-   | I15-   | I16-    |  |
|                                      | 6420- | 6421- | 6422- | 6427- | 6429- |       | O10-   | O11-   | O16-   |        |        |         |  |
| Myocarditis                          | 03282 | 03643 | 07423 | 09382 | 1303  | 3912  | A381   | A3952  | B2682  | B3322  | B5881  | D8685   |  |
|                                      | 3980  | 422-  | 4290  |       |       |       | I012   | I090   | I40-   | I41    | I514   | J1082   |  |
|                                      |       |       |       |       |       |       | J1182  |        |        |        |        |         |  |
| Non-coronary atherosclerosis         | 4350  | 4351  | 4352  | 4353  | 4370  | 440-  | E085-  | E095-  | E105-  | E115-  | E135-  | I672    |  |
|                                      | 441-  | 442-  | 44389 | 4439  | 444-  | 445-  | I70-   | I711   | I712   | I713   | I714   | I715    |  |
|                                      | 4471  | 5571  | 5579  |       |       |       | I716   | I718   | I719   | I72-   | I7389  | I739    |  |
|                                      |       |       |       |       |       |       | I74-   | I75-   | I771   | I79-   | K551   | K558    |  |
|                                      |       |       |       |       |       |       | K559   | T8231- | V434   | Z9582- | Z9862  |         |  |
| Obesity                              | 278-  | 6491- | 6492- | V853- | V854- |       | E65    | E66-   | E67-   | E68    | O9921- |         |  |
|                                      |       |       |       |       |       |       | Z683-  | Z684-  |        |        |        |         |  |
| Prior history of CVA/TIA             | 433-  | 434-  | 4353  | 4358  | 4359  | 436   | G450   | G451   | G452   | G458   | G459   | G46-    |  |
|                                      | 4371  | 4378  | 4379  | 438-  | V1254 | V4588 | I63-   | I65-   | I66-   | I6781  | I6782  | I6784-  |  |
|                                      |       |       |       |       |       |       | I6789  | I693-  | I698-  | I699-  | Z8673  | Z9282   |  |
| Psychotic disorder                   | 2908  | 2909  | 29381 | 29382 | 295-  | 296-4 | F060   | F2-    | F302   | F312   | F315   | F3164   |  |
|                                      | 297-  | 298-  | 7801  |       |       |       | F323   | F333   | F53    | F531   | R440   | R441    |  |

|                        |                  |       |       |       |       |       |       |        |        |       |       |        |  |  |
|------------------------|------------------|-------|-------|-------|-------|-------|-------|--------|--------|-------|-------|--------|--|--|
|                        |                  |       |       |       |       |       | R442  | R443   |        |       |       |        |  |  |
| Sleep apnea            | 3272-            | 78051 | 78053 | 78057 |       |       | G473- |        |        |       |       |        |  |  |
| Systolic dysfunction   | 428-             | 4284- |       |       |       |       | I502- | I504-  | I5082  | I5084 |       |        |  |  |
| Tobacco use disorder   | 3051             | 6490- | 98984 | V1582 |       |       | F172- | O9933- | T652-  | Z716  | Z720  | Z87891 |  |  |
| Valvular disorders     | <i>Dx</i> 394-   | 395-  | 396-  | 397-  | 3989- | 4240  | I05-  | I06-   | I07-   | I08-  | I091  | I098-  |  |  |
|                        | 4241             | 4242  | 4243  | 7460- | 7461  | 7462  | I099  | I34-   | I35-   | I36-  | I37-  | Q22-   |  |  |
|                        | 7463             | 7464  | 7465  | 7466  | 7467  | 99602 | Q23-  | T820-  | T8222- | T826- | Z952  | Z953   |  |  |
|                        | 99671            | V422  | V433  |       |       |       | Z954  |        |        |       |       |        |  |  |
|                        | <i>Proc</i> 350- | 351-  | 352-  | 3596  | 3597  | 3599  | 025F- | 025G-  | 025H-  | 025J- | 027F- | 027G-  |  |  |
|                        |                  |       |       |       |       |       | 027H- | 027J-  | 02BF-  | 02BG- | 02BH- | 02BJ-  |  |  |
|                        |                  |       |       |       |       |       | 02NF- | 02NG-  | 02NH-  | 02NJ- | 02QF- | 02QG-  |  |  |
|                        |                  |       |       |       |       |       | 02QH- | 02QJ-  | 02RF-  | 02RG- | 02RH- | 02RJ-  |  |  |
|                        |                  |       |       |       |       |       | 02TH- | 02UF-  | 02UG-  | 02UH- | 02UJ- | 02VG-  |  |  |
|                        |                  |       |       |       |       |       | 02WF- | 02WG-  | 02WH-  | 02WJ- | X2RF- |        |  |  |
| Ventricular arrhythmia | 4271             | 4274- |       |       |       |       | I462  | I469   | I470   | I472  | I490- | I493   |  |  |

<sup>a</sup> Does not include unstable angina pectoris or acute coronary syndrome codes  
 Symbols: - Wildcard digit or character

Supplemental Table 2. List of CPT, HCPCS, and ICD Codes for CAD Testing Procedures

| Variable                | CPT / HCPCS |        |        |        |        |        | ICD-9 / 10 |        |         |        |        |        |  |  |
|-------------------------|-------------|--------|--------|--------|--------|--------|------------|--------|---------|--------|--------|--------|--|--|
| Stress ECG              | 93015       | 93016  | 93017  | 93018  |        |        | 8941       | 8942   | 8943    | 8944   |        |        |  |  |
| Stress Echocardiography | 93350       | 93351  | 93352  |        |        |        |            |        |         |        |        |        |  |  |
| Stress Testing          |             |        |        |        |        |        | 4A-2XM4    |        |         |        |        |        |  |  |
| Nuclear                 | 78451       | 78452  | 78453  | 78454  | 7846-  | 7847-  | 9205       | C21-   | C22-    | C23-   |        |        |  |  |
|                         | 7848-       | 7849-  |        |        |        |        |            |        |         |        |        |        |  |  |
| Cardiac MRI             | 7555-       | 7556-  |        |        |        |        | 8892       | B23-   |         |        |        |        |  |  |
| Coronary CTA            | 75571       | 75574  |        |        |        |        | B22-       |        |         |        |        |        |  |  |
| Coronary Angiography    | 93454       | 93455  | 93456  | 93457  | 93458  | 93459  | 8850       | 8853   | 8854    | 8855   | 8856   | 8857   |  |  |
|                         | 93460       | 93461  | 93508* | 93539* | 93540* | 93545* | 8859       | B21-   | 4A033-C |        |        |        |  |  |
|                         | 93556*      | 93567  | 93571  | 93572  |        |        |            |        |         |        |        |        |  |  |
| PCI <sup>a</sup>        | 9292-       | 9293-  | 92943  | 92944  | 92973  | 9298-* | 0066       | 1755   | 3606    | 3607   | 3609   | 027-3- |  |  |
|                         | 92995*      | 92996* | C1874* | C1875* | G0290* | G0291* | 027-4-     | 02C03- | 02C13-  | 02C23- | 02C33- | 02C04- |  |  |
|                         | C9600       | C9601  | C9602  | C9603  | C9604  | C9605  | 02C14-     | 02C24- | 02C34-  | 02H03- | 02H13- | 02H23- |  |  |
|                         | C9607       | C9708  |        |        |        |        | 02H33-     | 02H04- | 02H14-  | 02H24- | 02H34- |        |  |  |

Abbreviations: ECG, electrocardiogram; MRI, magnetic resonance imaging; CTA, computed tomography angiography; PCI, percutaneous coronary intervention; <sup>a</sup> Includes atherectomy, thrombectomy, and stenting but not adjunctive therapies (e.g., brachytherapy, chemical thrombolysis). Does not include left heart catheterization codes given not specific for PCI  
 Symbols: \* Deleted code; - Wildcard digit or character

Supplemental Table 3. Predictors of CAD Testing – Sensitivity Analyses by Inclusion Criteria

| Inclusion Criteria                            | Base case<br>( <i>N</i> = 558,322) | 24-mo. lookback<br>( <i>N</i> = 412,154) | CAD subset<br>( <i>N</i> = 213,926) | Inpatient HF subset<br>( <i>N</i> = 64,153) |
|-----------------------------------------------|------------------------------------|------------------------------------------|-------------------------------------|---------------------------------------------|
| <b>Adj. Probability (95% CI), %</b>           | 34.5 (33.4–35.6)                   | 31.8 (31.7–32.0)                         | 32.9 (32.7–33.1)                    | 47.6 (47.2–48.0)                            |
| Variables                                     | Adjusted OR (95% CI)               |                                          |                                     |                                             |
| <b>Age Group</b> ( <i>vs.</i> <40)            |                                    |                                          |                                     |                                             |
| 40 – 64                                       | 1.54 (1.47–1.61)                   | 1.53 (1.44–1.62)                         | 0.93 (0.77–1.12)                    | 1.39 (1.22–1.58)                            |
| 65 – 79                                       | 0.99 (0.94–1.03)                   | 0.96 (0.90–1.01)                         | 0.68 (0.56–0.82)                    | 0.83 (0.73–0.94)                            |
| ≥ 80                                          | 0.51 (0.48–0.53)                   | 0.50 (0.47–0.53)                         | 0.42 (0.35–0.51)                    | 0.35 (0.30–0.40)                            |
| <b>Female Sex</b>                             | 0.74 (0.73–0.75)                   | 0.73 (0.72–0.75)                         | 0.80 (0.79–0.82)                    | 0.77 (0.74–0.80)                            |
| <b>Race and ethnicity</b> ( <i>vs.</i> White) |                                    |                                          |                                     |                                             |
| Asian                                         | 1.06 (1.01–1.10)                   | 1.03 (0.99–1.09)                         | 1.09 (1.02–1.16)                    | 1.08 (0.95–1.22)                            |
| Black                                         | 0.90 (0.88–0.92)                   | 0.90 (0.88–0.92)                         | 0.94 (0.91–0.97)                    | 0.95 (0.91–1.00)                            |
| Hispanic                                      | 0.99 (0.97–1.02)                   | 0.98 (0.95–1.00)                         | 1.02 (0.98–1.05)                    | 1.05 (0.99–1.13)                            |
| Unknown                                       | 0.94 (0.92–0.96)                   | 0.93 (0.90–0.95)                         | 0.99 (0.95–1.02)                    | 0.99 (0.93–1.05)                            |
| <b>Region</b> ( <i>vs.</i> Northeast)         |                                    |                                          |                                     |                                             |
| Midwest                                       | 1.08 (1.06–1.11)                   | 1.07 (1.04–1.10)                         | 1.05 (1.01–1.08)                    | 1.05 (0.99–1.12)                            |
| South                                         | 1.06 (1.04–1.09)                   | 1.05 (1.02–1.07)                         | 1.06 (1.03–1.09)                    | 1.04 (0.99–1.11)                            |
| West                                          | 1.02 (0.84–1.22)                   | 1.06 (0.86–1.32)                         | 1.39 (0.95–2.03)                    | 0.94 (0.54–1.63)                            |
| Unknown                                       | 0.85 (0.83–0.87)                   | 0.83 (0.81–0.85)                         | 0.98 (0.94–1.01)                    | 0.82 (0.77–0.88)                            |
| <b>Care Setting – ED / Inpatient</b>          | 1.43 (1.42–1.45)                   | 1.42 (1.40–1.44)                         | 1.69 (1.66–1.73)                    | n/a                                         |
| <b>Systolic Dysfunction</b>                   | 2.49 (2.46–2.53)                   | 2.50 (2.46–2.54)                         | 1.67 (1.64–1.71)                    | 2.33 (2.25–2.42)                            |
| <b>Cardiovascular Conditions</b>              |                                    |                                          |                                     |                                             |
| Atrial fibrillation/flutter                   | 0.89 (0.87–0.90)                   | 0.89 (0.88–0.91)                         | 0.86 (0.84–0.87)                    | 0.77 (0.74–0.80)                            |
| Cardiogenic shock                             | 2.55 (2.44–2.66)                   | 2.58 (2.46–2.71)                         | 2.74 (2.54–2.97)                    | 2.91 (2.53–3.35)                            |
| Diabetes                                      | 0.97 (0.96–0.99)                   | 0.99 (0.97–1.00)                         | 1.06 (1.03–1.08)                    | 1.02 (0.98–1.06)                            |
| Endocarditis                                  | 1.17 (1.12–1.22)                   | 1.18 (1.12–1.24)                         | 1.11 (1.04–1.19)                    | 1.25 (1.11–1.41)                            |
| Hyperlipidemia                                | 1.80 (1.78–1.83)                   | 1.81 (1.78–1.84)                         | 1.92 (1.86–1.99)                    | 1.59 (1.53–1.65)                            |
| Hypertension                                  | 1.08 (1.06–1.11)                   | 1.09 (1.07–1.12)                         | 1.19 (1.13–1.25)                    | 0.93 (0.87–0.99)                            |
| Myocarditis                                   | 2.79 (2.49–3.12)                   | 2.77 (2.42–3.17)                         | 1.52 (1.24–1.85)                    | 1.91 (1.46–2.54)                            |
| Noncoronary atherosclerosis                   | 1.13 (1.12–1.15)                   | 1.12 (1.10–1.14)                         | 1.10 (1.08–1.13)                    | 1.11 (1.07–1.16)                            |
| Obesity                                       | 1.07 (1.05–1.09)                   | 1.06 (1.04–1.08)                         | 1.08 (1.05–1.11)                    | 0.97 (0.93–1.02)                            |
| Prior history of CVA/TIA                      | 1.13 (1.11–1.15)                   | 1.14 (1.12–1.16)                         | 1.13 (1.10–1.15)                    | 1.09 (1.04–1.14)                            |
| Valvular disorder                             | 1.79 (1.76–1.81)                   | 1.76 (1.74–1.79)                         | 1.46 (1.43–1.49)                    | 1.39 (1.34–1.44)                            |
| Ventricular arrhythmia                        | 1.92 (1.88–1.96)                   | 1.91 (1.86–1.96)                         | 1.42 (1.38–1.46)                    | 1.76 (1.66–1.86)                            |
| <b>Other Conditions</b>                       |                                    |                                          |                                     |                                             |
| Alcohol use disorder                          | 0.82 (0.80–0.85)                   | 0.81 (0.78–0.84)                         | 0.86 (0.81–0.90)                    | 1.06 (0.98–1.14)                            |
| Cancer                                        | 0.89 (0.88–0.91)                   | 0.90 (0.88–0.91)                         | 0.90 (0.88–0.92)                    | 0.92 (0.88–0.96)                            |
| Chronic kidney disease                        | 0.76 (0.75–0.77)                   | 0.76 (0.75–0.77)                         | 0.86 (0.84–0.88)                    | 0.75 (0.72–0.78)                            |
| Chronic liver disease                         | 0.89 (0.87–0.91)                   | 0.89 (0.87–0.92)                         | 0.93 (0.90–0.97)                    | 1.03 (0.97–1.10)                            |
| COPD or asthma                                | 0.82 (0.81–0.83)                   | 0.82 (0.81–0.84)                         | 0.89 (0.87–0.90)                    | 0.85 (0.82–0.88)                            |
| Dementia                                      | 0.38 (0.37–0.39)                   | 0.38 (0.37–0.39)                         | 0.46 (0.44–0.48)                    | 0.42 (0.39–0.45)                            |
| Depression                                    | 0.86 (0.85–0.87)                   | 0.86 (0.84–0.87)                         | 0.91 (0.89–0.93)                    | 0.93 (0.89–0.98)                            |
| Psychotic disorder                            | 0.59 (0.57–0.61)                   | 0.58 (0.56–0.61)                         | 0.66 (0.63–0.70)                    | 0.62 (0.56–0.68)                            |
| Sleep apnea                                   | 1.01 (0.99–1.03)                   | 1.02 (0.99–1.04)                         | 1.10 (1.07–1.13)                    | 0.89 (0.84–0.93)                            |
| Tobacco use disorder                          | 1.32 (1.30–1.34)                   | 1.30 (1.28–1.33)                         | 1.15 (1.13–1.18)                    | 1.20 (1.15–1.25)                            |

Supplemental Table 4. Predictors of CAD Testing – Sensitivity Analyses by Scenario

| Scenario                              | Restricted<br>(N = 473,753)         | Base case<br>(N = 558,322)                 | Expanded<br>(N = 515,605)                   |
|---------------------------------------|-------------------------------------|--------------------------------------------|---------------------------------------------|
| Outcome Window                        | From index<br>to 90 days post-index | From 90 days pre-<br>to 90 days post-index | From 90 days pre-<br>to 180 days post-index |
| <b>Adj. Probability (95% CI), %</b>   | 24.6 (24.4–24.7)                    | 34.5 (33.4–35.6)                           | 35.7 (35.6–35.9)                            |
| Variables Adjusted OR (95% CI)        |                                     |                                            |                                             |
| <b>Age Group (vs. &lt;40)</b>         |                                     |                                            |                                             |
| 40 – 64                               | 1.61 (1.53–1.69)                    | 1.54 (1.47–1.61)                           | 1.57 (1.49–1.64)                            |
| 65 – 79                               | 1.02 (0.97–1.07)                    | 0.99 (0.94–1.03)                           | 1.02 (0.97–1.07)                            |
| ≥ 80                                  | 0.51 (0.49–0.54)                    | 0.51 (0.48–0.53)                           | 0.52 (0.49–0.54)                            |
| <b>Female Sex</b>                     | 0.75 (0.74–0.77)                    | 0.74 (0.73–0.75)                           | 0.74 (0.73–0.75)                            |
| <b>Race and ethnicity (vs. White)</b> |                                     |                                            |                                             |
| Asian                                 | 1.08 (1.03–1.13)                    | 1.06 (1.01–1.10)                           | 1.06 (1.02–1.11)                            |
| Black                                 | 0.92 (0.90–0.94)                    | 0.90 (0.88–0.92)                           | 0.92 (0.90–0.93)                            |
| Hispanic                              | 1.01 (0.99–1.04)                    | 0.99 (0.97–1.02)                           | 1.00 (0.98–1.02)                            |
| Unknown                               | 0.94 (0.92–0.96)                    | 0.94 (0.92–0.96)                           | 0.93 (0.91–0.95)                            |
| <b>Region (vs. Northeast)</b>         |                                     |                                            |                                             |
| Midwest                               | 1.05 (1.03–1.08)                    | 1.08 (1.06–1.11)                           | 1.08 (1.05–1.10)                            |
| South                                 | 1.04 (1.02–1.07)                    | 1.06 (1.04–1.09)                           | 1.06 (1.04–1.08)                            |
| West                                  | 0.96 (0.78–1.19)                    | 1.02 (0.84–1.22)                           | 1.01 (0.84–1.22)                            |
| Unknown                               | 0.83 (0.81–0.85)                    | 0.85 (0.83–0.87)                           | 0.85 (0.83–0.87)                            |
| <b>HF Dx in ED/Inpatient Claims</b>   | 1.82 (1.79–1.85)                    | 1.43 (1.42–1.45)                           | 1.40 (1.39–1.42)                            |
| <b>Systolic Dysfunction</b>           | 2.90 (2.86–2.95)                    | 2.49 (2.46–2.53)                           | 2.42 (2.39–2.46)                            |
| <b>Cardiovascular Conditions</b>      |                                     |                                            |                                             |
| Atrial fibrillation/flutter           | 0.84 (0.83–0.85)                    | 0.89 (0.87–0.90)                           | 0.90 (0.89–0.91)                            |
| Cardiogenic shock                     | 2.49 (2.38–2.61)                    | 2.55 (2.44–2.66)                           | 2.50 (2.39–2.62)                            |
| Diabetes                              | 0.99 (0.97–1.00)                    | 0.97 (0.96–0.99)                           | 0.99 (0.98–1.01)                            |
| Endocarditis                          | 1.13 (1.07–1.19)                    | 1.17 (1.12–1.22)                           | 1.16 (1.11–1.21)                            |
| Hyperlipidemia                        | 1.65 (1.62–1.68)                    | 1.80 (1.78–1.83)                           | 1.74 (1.72–1.77)                            |
| Hypertension                          | 1.04 (1.02–1.06)                    | 1.08 (1.06–1.11)                           | 1.07 (1.05–1.09)                            |
| Myocarditis                           | 2.79 (2.46–3.16)                    | 2.79 (2.49–3.12)                           | 2.73 (2.42–3.08)                            |
| Noncoronary atherosclerosis           | 1.05 (1.04–1.07)                    | 1.13 (1.12–1.15)                           | 1.13 (1.11–1.14)                            |
| Obesity                               | 1.04 (1.02–1.06)                    | 1.07 (1.05–1.09)                           | 1.06 (1.04–1.07)                            |
| Prior history of CVA/TIA              | 1.02 (1.01–1.04)                    | 1.13 (1.11–1.15)                           | 1.13 (1.11–1.14)                            |
| Valvular disorder                     | 1.72 (1.70–1.75)                    | 1.79 (1.76–1.81)                           | 1.75 (1.73–1.78)                            |
| Ventricular arrhythmia                | 1.81 (1.77–1.86)                    | 1.92 (1.88–1.96)                           | 1.87 (1.82–1.91)                            |
| <b>Other Conditions</b>               |                                     |                                            |                                             |
| Alcohol use disorder                  | 0.86 (0.83–0.89)                    | 0.82 (0.80–0.85)                           | 0.83 (0.80–0.85)                            |
| Cancer                                | 0.84 (0.82–0.85)                    | 0.89 (0.88–0.91)                           | 0.93 (0.91–0.94)                            |
| Chronic kidney disease                | 0.76 (0.75–0.77)                    | 0.76 (0.75–0.77)                           | 0.77 (0.76–0.79)                            |
| Chronic liver disease                 | 0.84 (0.82–0.87)                    | 0.89 (0.87–0.91)                           | 0.92 (0.90–0.94)                            |
| COPD or asthma                        | 0.81 (0.80–0.83)                    | 0.82 (0.81–0.83)                           | 0.84 (0.82–0.85)                            |
| Dementia                              | 0.37 (0.36–0.38)                    | 0.38 (0.37–0.39)                           | 0.37 (0.36–0.39)                            |
| Depression                            | 0.82 (0.81–0.84)                    | 0.86 (0.85–0.87)                           | 0.87 (0.86–0.88)                            |
| Psychotic disorder                    | 0.57 (0.54–0.59)                    | 0.59 (0.57–0.61)                           | 0.61 (0.58–0.63)                            |
| Sleep apnea                           | 0.98 (0.96–1.01)                    | 1.01 (0.99–1.03)                           | 1.02 (1.00–1.04)                            |
| Tobacco use disorder                  | 1.24 (1.22–1.26)                    | 1.32 (1.30–1.34)                           | 1.31 (1.29–1.33)                            |

Supplemental Figure 1. Breakdown of CAD Testing and Interventions by Modality

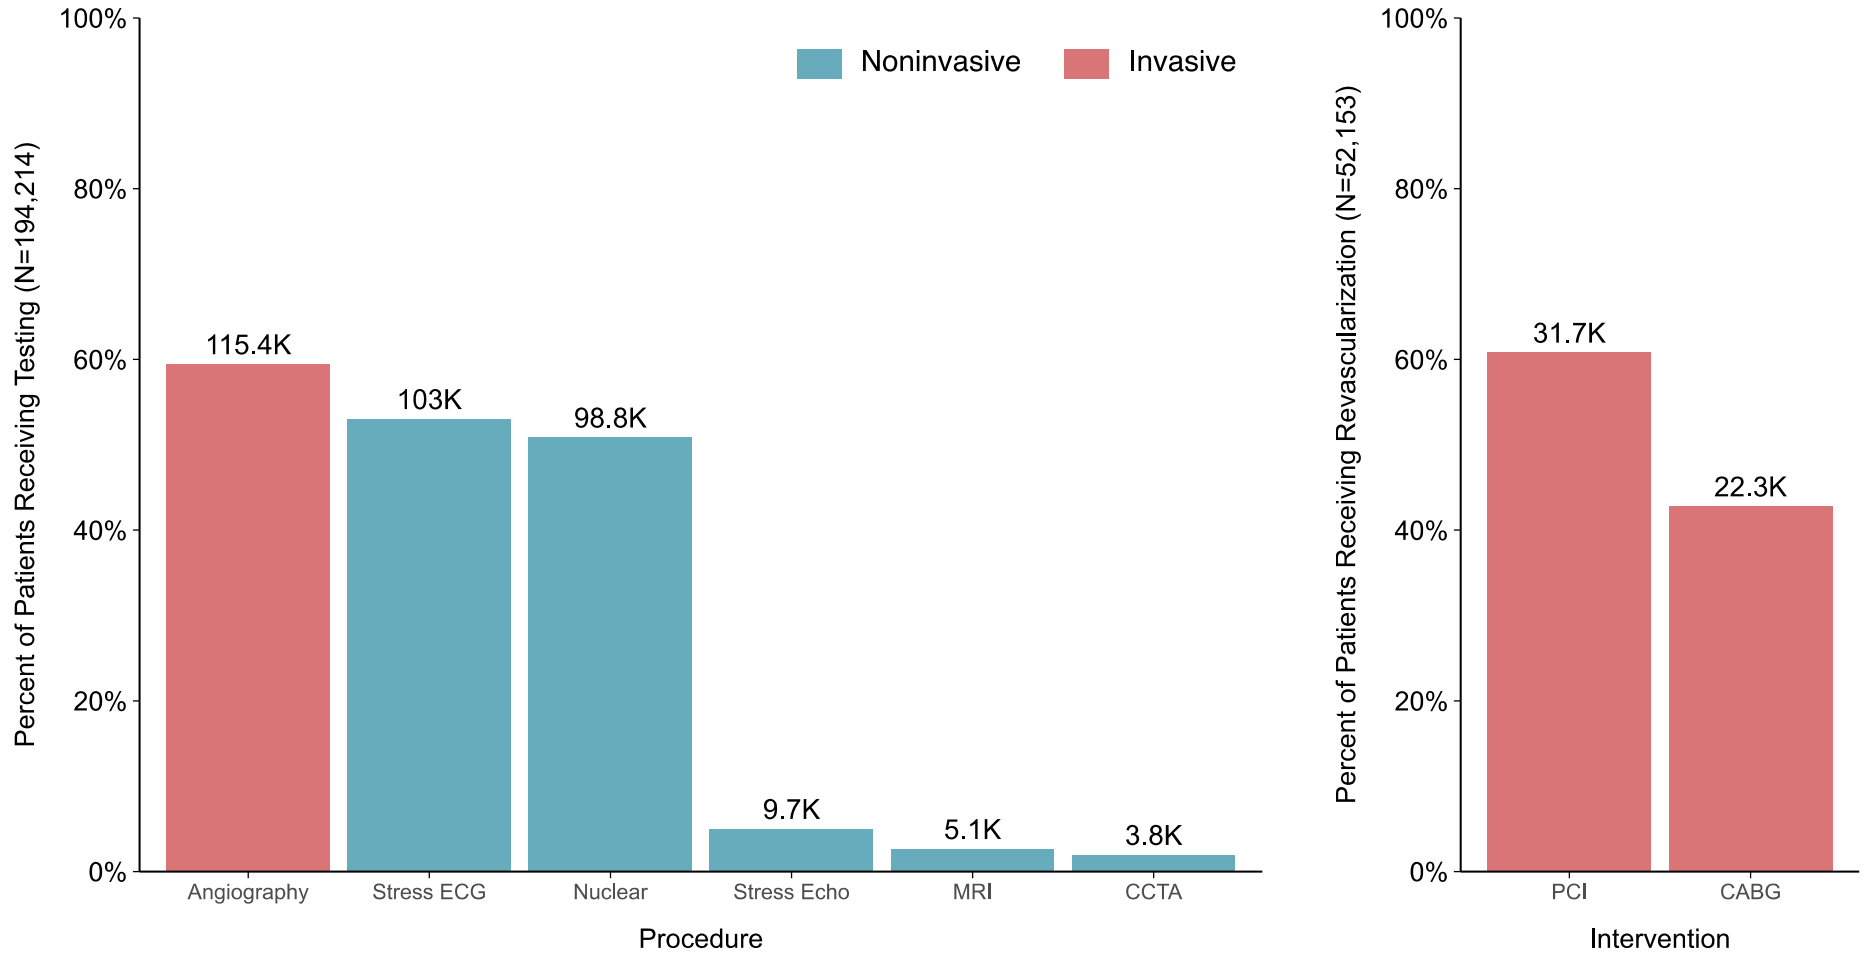

This graph displays the 194,214 patients who undergo CAD testing separated by procedure type and color-coded by interventional status. As shown, the most frequent procedures are coronary angiography, stress ECG, and nuclear imaging studies. 52,153 patients receive revascularization, with the majority undergoing percutaneous coronary intervention.

Supplemental Figure 2. National Variation in CAD Testing for Incident Heart Failure Patients

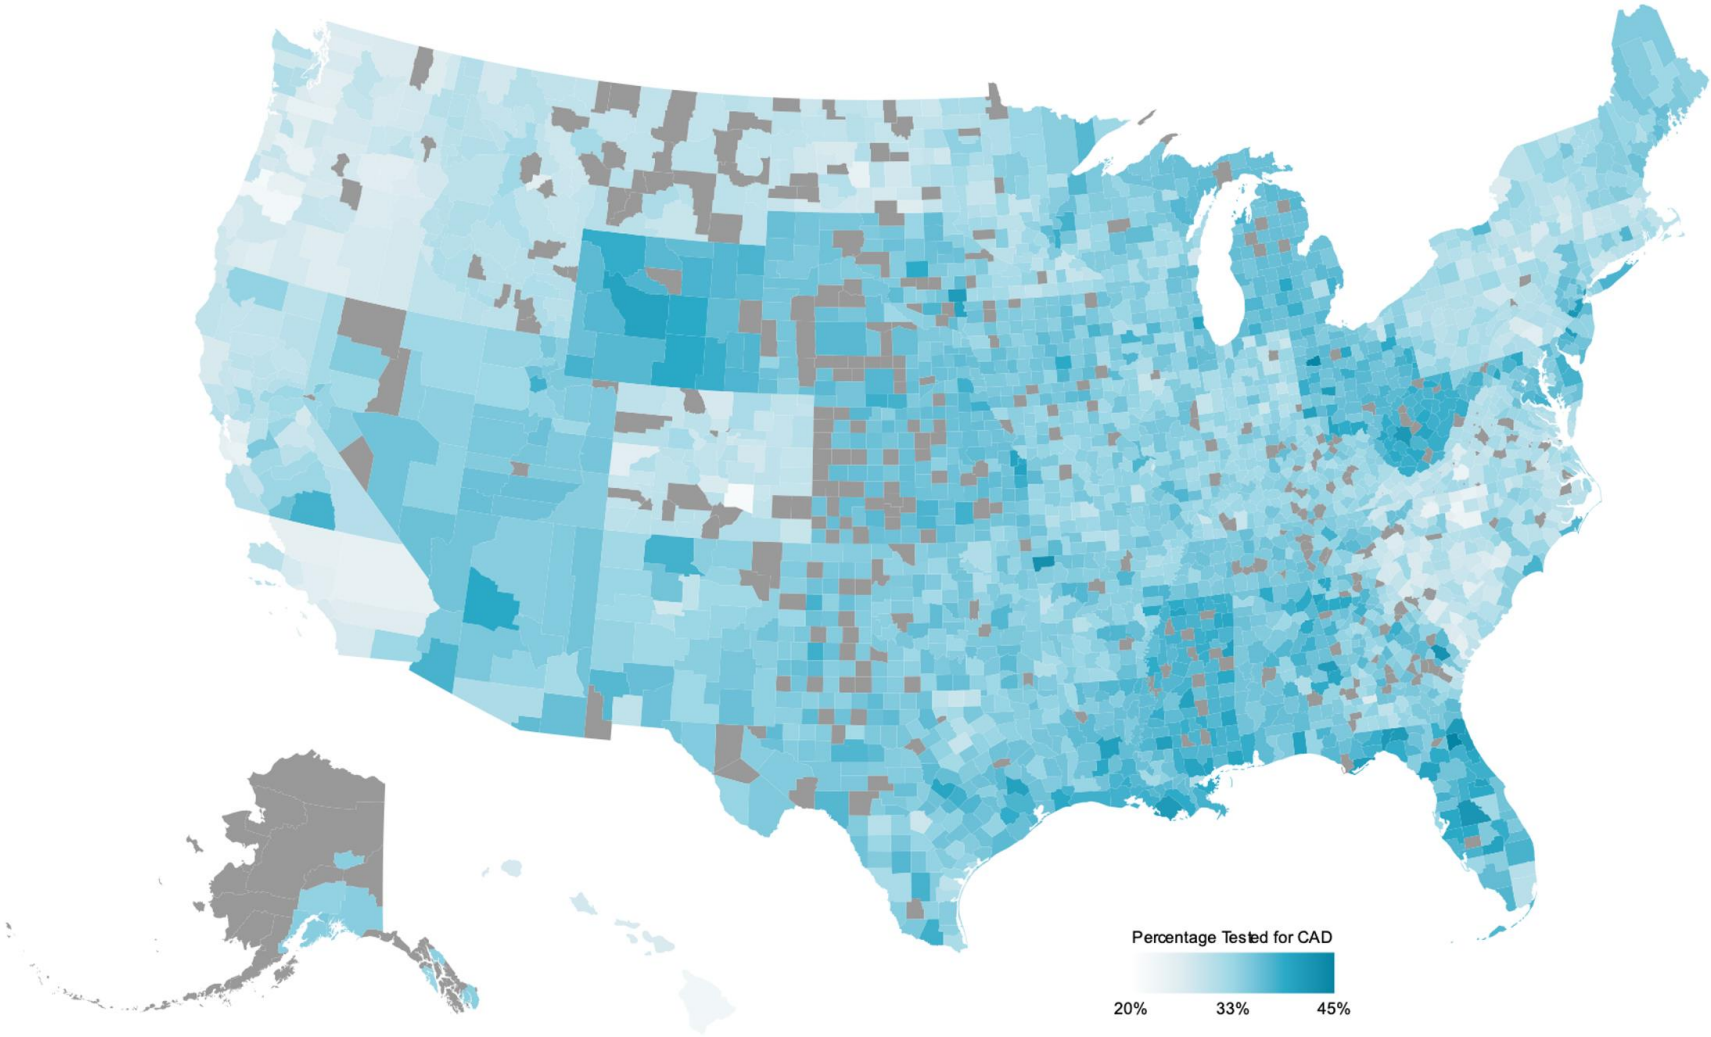

This choropleth map visualizes the adjusted percentage of patients tested for CAD across counties. Counties with insufficient data are colored dark gray. Testing probabilities range from 20.4% in San Luis Obispo County of California to 45.2% in Clay County of Florida.

Supplemental Figure 3. Variation in the Frequency of CAD Testing across Primary Care Physicians

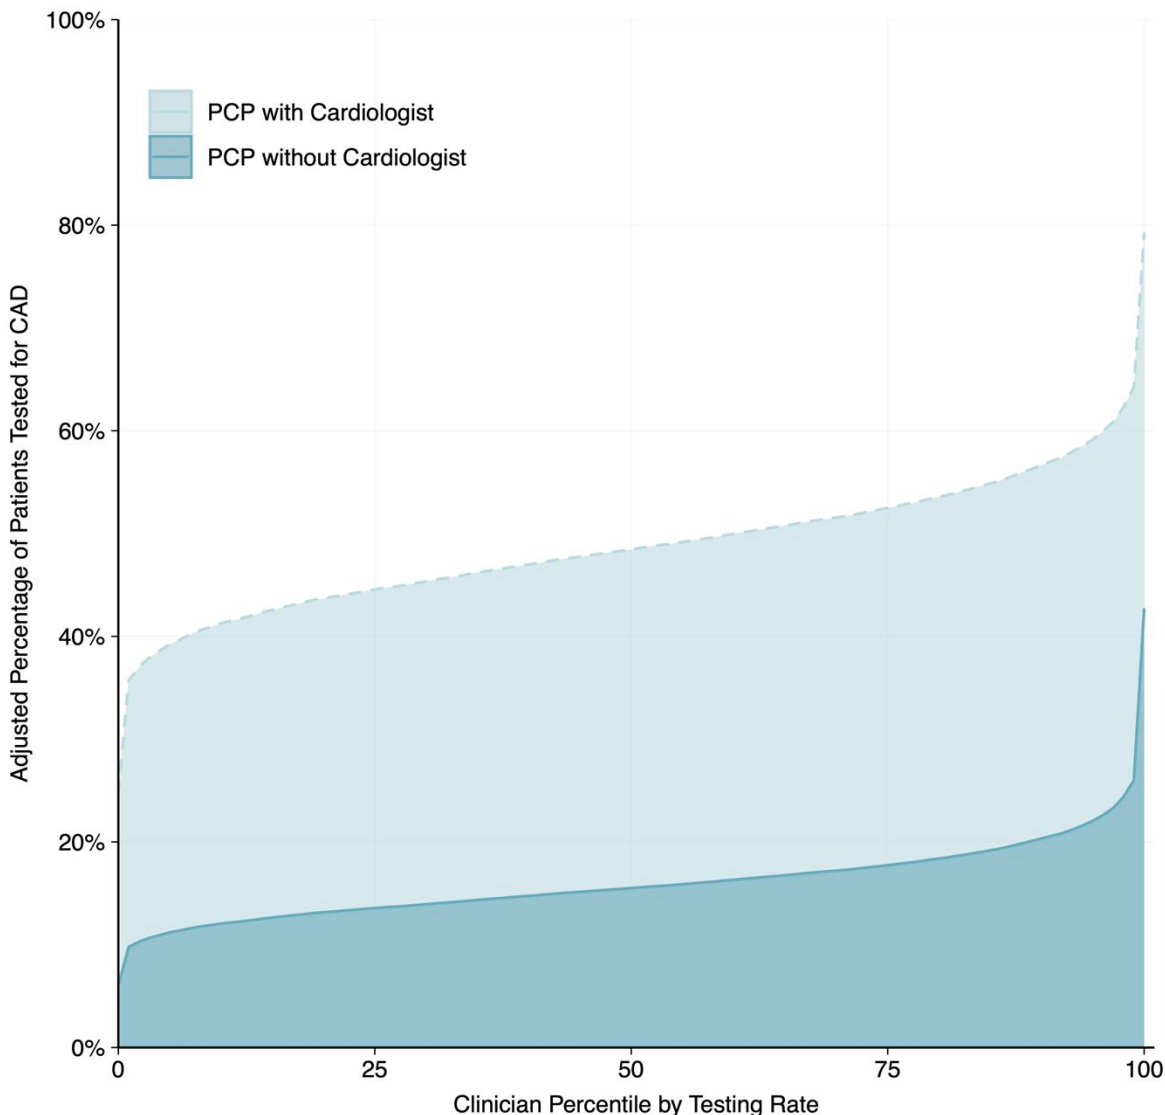

This cumulative distribution curve shows 8,447 primary care physicians ordered by their CAD testing rates for an average-risk patient. The dotted curve represents CAD testing rates with cardiologist co-management. All patient-level covariates are conditioned at their means. The interquartile range of testing probability, as seen by the 25<sup>th</sup> and 75<sup>th</sup> clinician percentiles, is 13.6 to 17.7% for PCP alone and 44.6 to 52.5% with a co-managing cardiologist. Only PCPs with at least 10 new HF diagnoses during the study period are included in this analysis.
